# Supplementary material
Source: PubMed Central journal article supplement (PMC3215037)

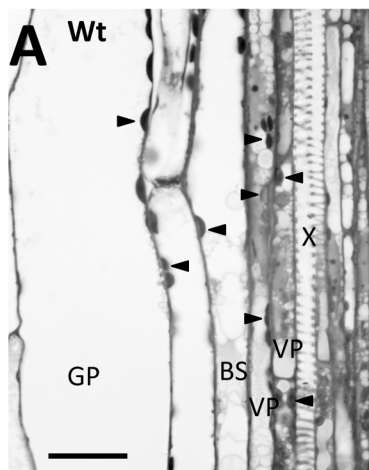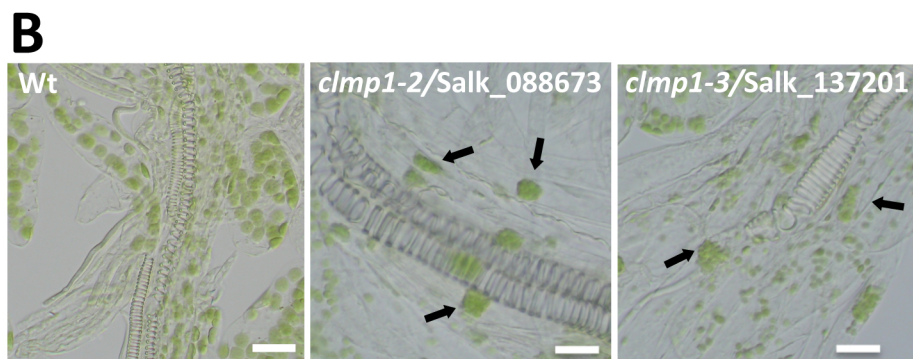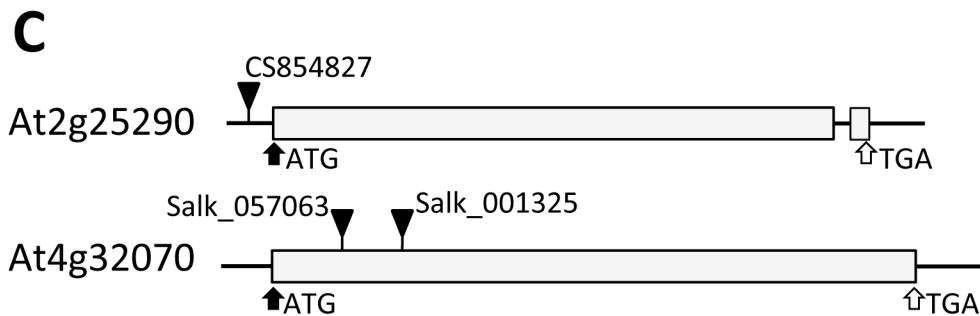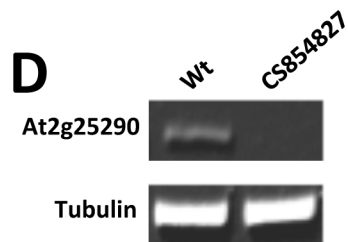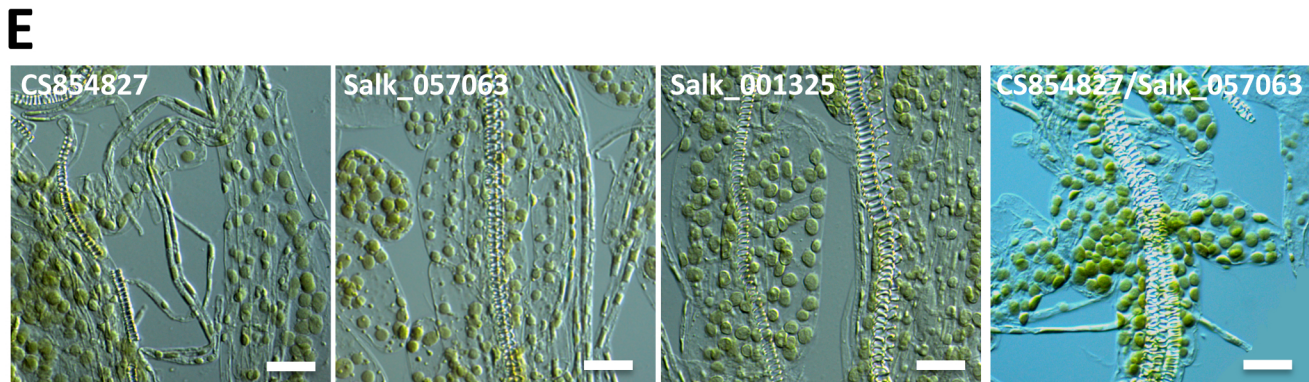

Supplement: 1106706108_sfig01.pdf [file 1106706108_sfig01.pdf]

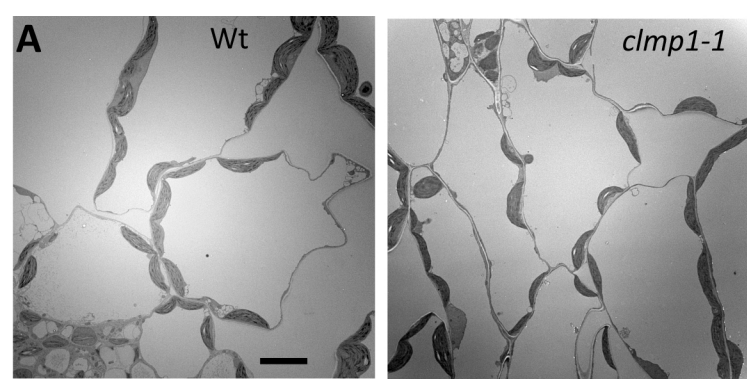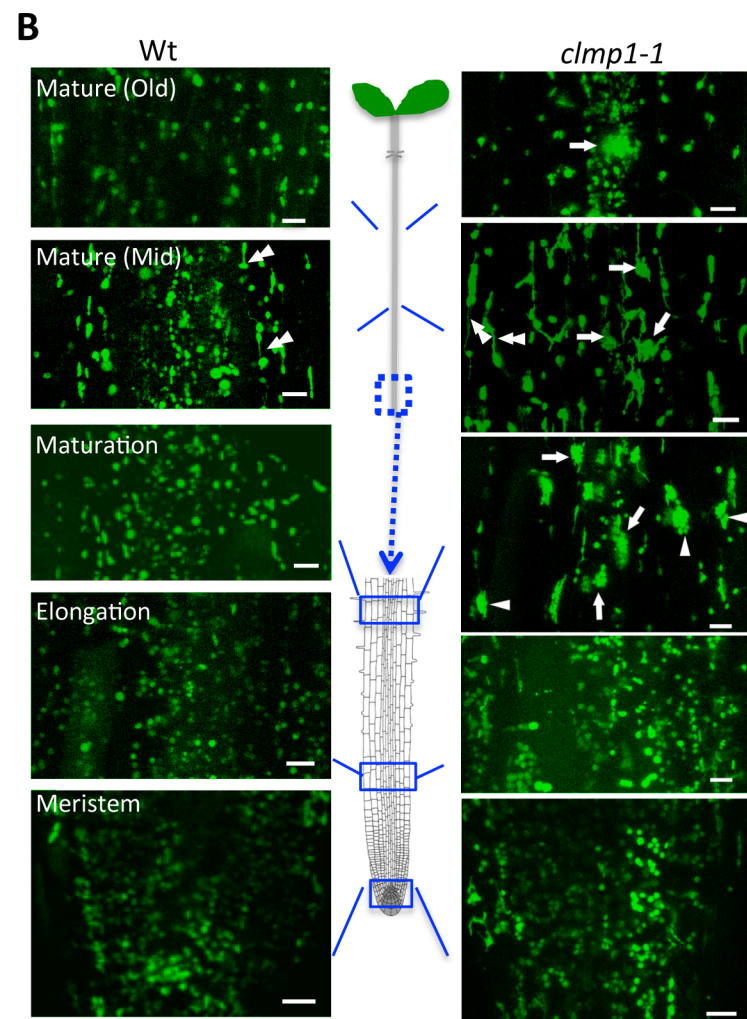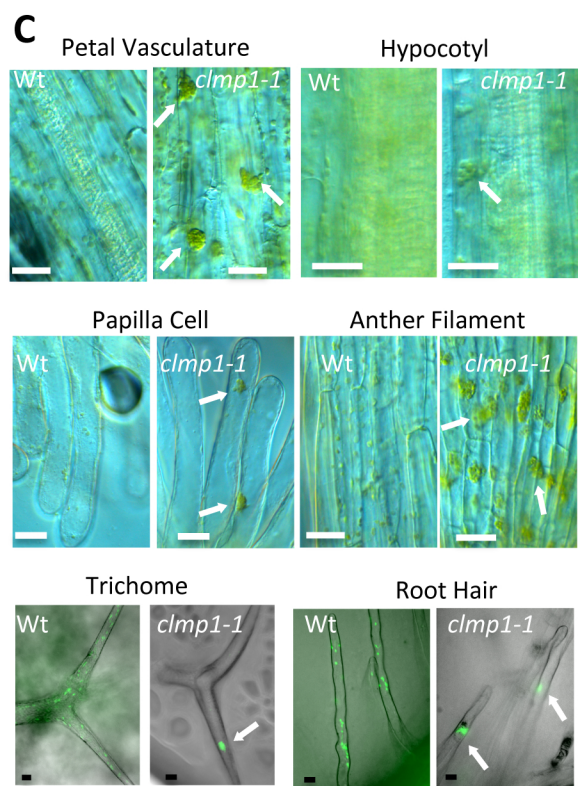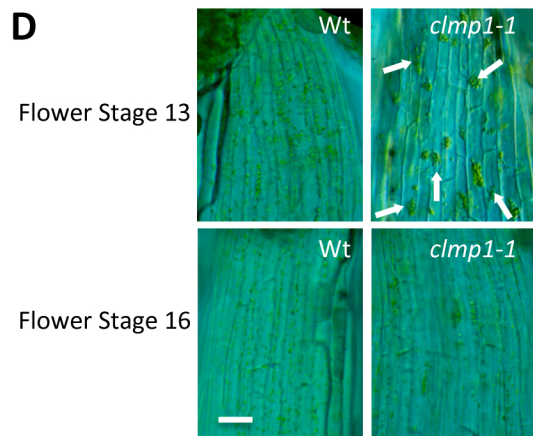

Supplement: 1106706108_sfig03.pdf [file 1106706108_sfig03.pdf]

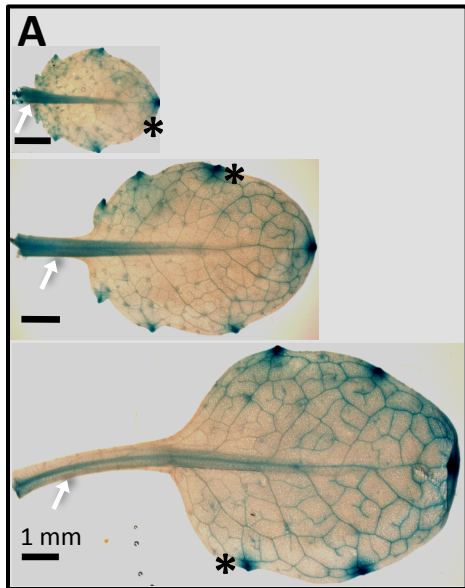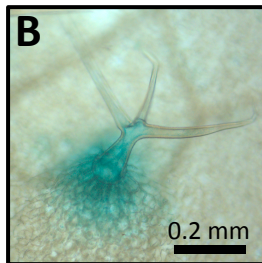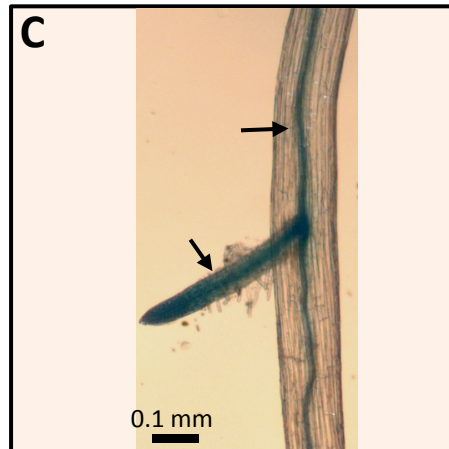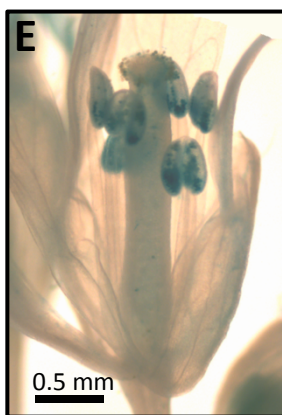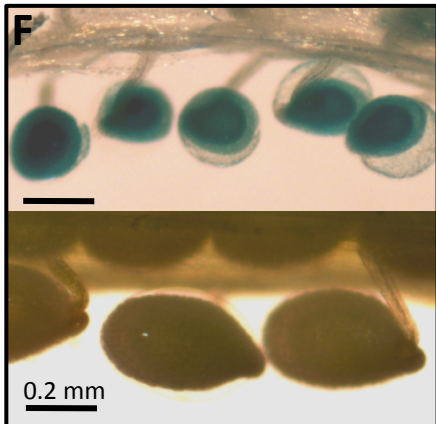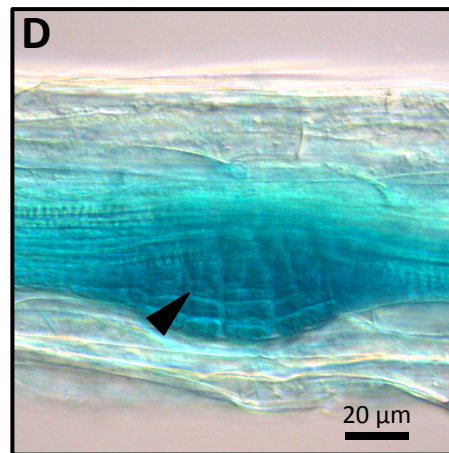

Supplement: 1106706108_sfig04.pdf [file 1106706108_sfig04.pdf]

A

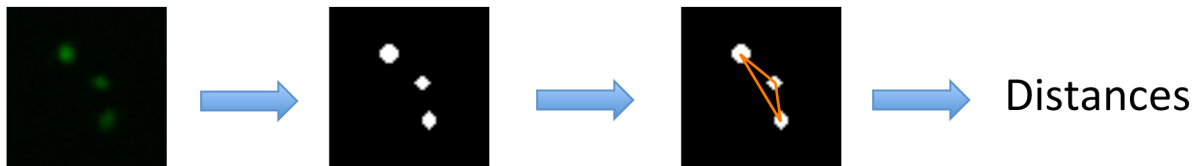

B

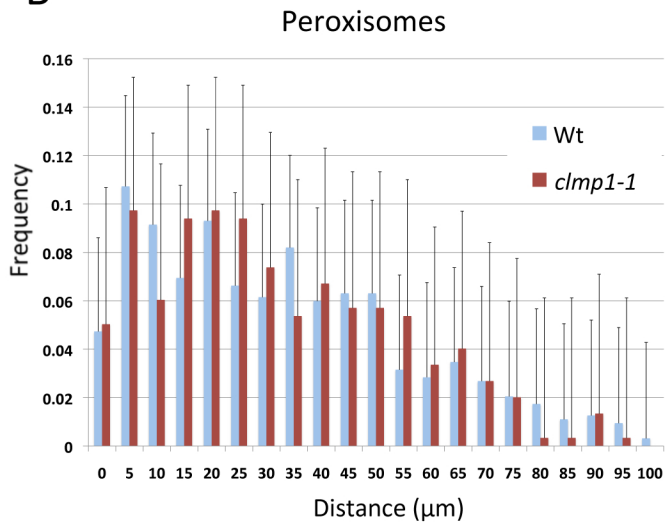

C

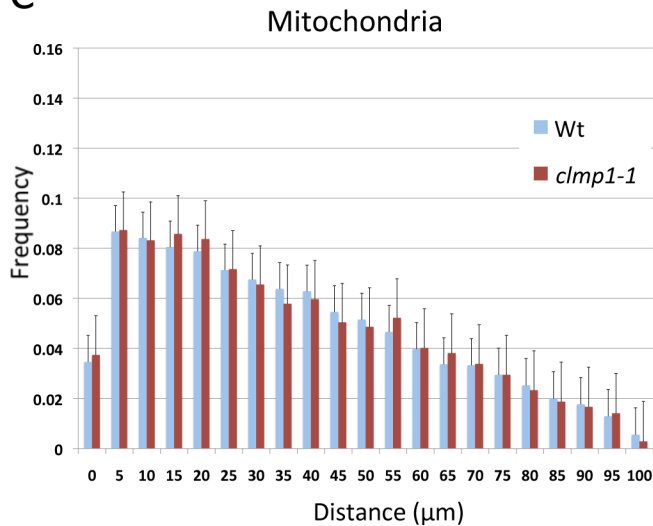

Supplement: 1106706108_sfig06.pdf [file 1106706108_sfig06.pdf]

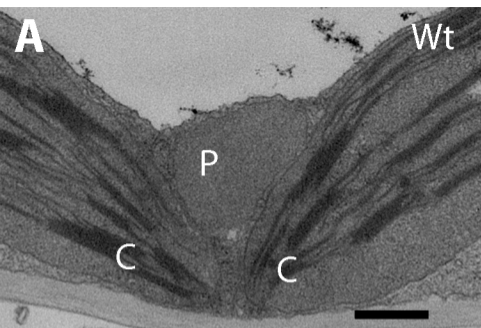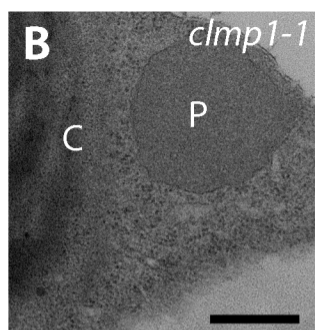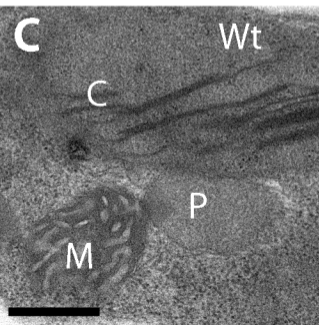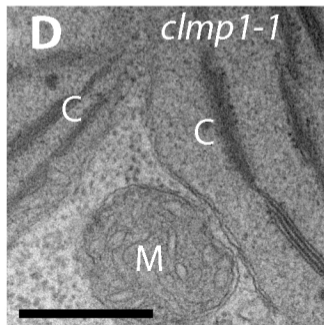

Supplement: 1106706108_sfig08.pdf [file 1106706108_sfig08.pdf]
